# Supplementary material
Source: ML conference proceedings conference paper supplement (https://openaccess.thecvf.com/content/CVPR2025/html/Wang_Adventurer_Optimizing_Vision_CVPR_2025_paper.html)
Supplement: Supplementary file 1 [file Wang_Adventurer_Optimizing_Vision_CVPR_2025_supplemental.pdf]

# Adventurer: Optimizing Vision Mamba Architecture Designs for Efficiency

## Supplementary Material

### Appendix

#### A. Technical Details

by  $base\_lr * batchsize/512$ ; the color jitter factor is set to 0.3; the mixup alpha and cutmix alpha are set to 0.8 and 1.0, respectively.

| Config                       | Small/Base | Large     |
|------------------------------|------------|-----------|
| input size                   | 128        |           |
| optimizer                    | AdamW      |           |
| base learning rate           | 5e-4       | 2e-4      |
| weight decay                 | 0.05       | 0.3       |
| epochs                       | 300        | 200       |
| optimizer betas              | 0.9, 0.999 | 0.9, 0.95 |
| batch size                   | 1024       | 4096      |
| warmup epochs                | 5          | 20        |
| stochastic depth (drop path) | 0.1        | 0.2       |
| layer-wise lr decay          | ✗          |           |
| label smoothing              | ✗          |           |
| random erasing               | ✗          |           |
| Rand Augmentation            | ✗          |           |
| repeated augmentation        | ✓          |           |
| ThreeAugmentation            | ✓          |           |

Table 8. Settings of Stage One

| Config                       | Small/Base           | Large     |
|------------------------------|----------------------|-----------|
| input size                   | 224                  |           |
| optimizer                    | AdamW                |           |
| base learning rate           | 1e-5                 | 2e-5      |
| weight decay                 | 0.1                  | 0.1       |
| epochs                       | 20                   | 50        |
| optimizer betas              | 0.9, 0.999           | 0.9, 0.95 |
| batch size                   | 512                  | 512       |
| warmup epochs                | 5                    | 5         |
| stochastic depth (drop path) | 0.4 (S), 0.6 (B)     | 0.6       |
| layer-wise lr decay          | ✗                    | 0.95      |
| label smoothing              | 0.1                  |           |
| random erasing               | ✗                    |           |
| Rand Augmentation            | rand-m9-mstd0.5-inc1 |           |
| repeated augmentation        | ✗                    |           |
| ThreeAugmentation            | ✗                    |           |

Table 10. Settings of Stage Three

| Config                       | Small/Base       | Large     |
|------------------------------|------------------|-----------|
| input size                   | 224              |           |
| optimizer                    | AdamW            |           |
| base learning rate           | 5e-4             | 8e-4      |
| weight decay                 | 0.05             | 0.3       |
| epochs                       | 100              | 50        |
| optimizer betas              | 0.9, 0.999       | 0.9, 0.95 |
| batch size                   | 1024             | 4096      |
| warmup epochs                | 5                | 20        |
| stochastic depth (drop path) | 0.2 (S), 0.4 (B) | 0.4       |
| layer-wise lr decay          | ✗                | 0.9       |
| label smoothing              | ✗                |           |
| random erasing               | ✗                |           |
| Rand Augmentation            | ✗                |           |
| repeated augmentation        | ✓                |           |
| ThreeAugmentation            | ✓                |           |

Table 9. Settings of Stage Two

We basically follow Mamba-Register’s three-stage training strategy [50] which has been found to be able to effectively prevent Mamba’s over-fitting and save training time. The detailed configurations of each stage are shown in Table 8, Table 9, and Table 10, respectively. For the Tiny-sized model, we directly train with the Small/Base’s stage-2 recipe for 300 epochs since the training time is short and the tiny model is not easy to get overfit. To train the Large-sized model, we make major modifications of the recipe compared with Mamba-Register to further shorten training time. For all stages, the actually learning rate is calculated
